# Supplementary material for: Incidence, Management Experience and Characteristics of Patients with Giardiasis and Common Variable Immunodeficiency
Source: MDPI journal article supplement (doi:10.3390/jcm11237007), 2022-11-27
Supplement: s1 [file s1]

**Supplementary Tables. Human Leukocyte Antigen (HLA) genomic typing of CVID patients with giardiasis.**

**Table S1.** HLA class I (A, B and C loci) genomic typing of CVID patients with giardiasis. HLA allele frequencies in the Spanish Caucasian population are indicated (obtained from Gonzalez-Galarza FF et al., 2020).

|               | HLA-A   | Allele<br>Frequency | HLA-A   | Allele<br>Frequency | HLA-B   | Allele<br>Frequency | HLA-B   | Allele<br>Frequency | HLA-C   | Allele<br>Frequency | HLA-C   | Allele<br>Frequency |
|---------------|---------|---------------------|---------|---------------------|---------|---------------------|---------|---------------------|---------|---------------------|---------|---------------------|
| <b>Case 1</b> | A*01:01 | 0.0985              | A*29:02 | 0.0783              | B*44:03 | 0.0998              | B*57:01 | 0.0234              | C*06:02 | 0.0737              | C*16:01 | 0.0807              |
| <b>Case 2</b> | A*29:02 | 0.0783              | A*32:01 | 0.0384              | B*37:01 | 0.0107              | B*51:01 | 0.0746              | C*02:02 | 0.0509              | C*06:02 | 0.0737              |
| <b>Case 3</b> | A*02:01 | 0.2368              | A*33:01 | 0.0191              | B*14:02 | 0.0399              | B*49:01 | 0.0371              | C*07:01 | 0.1301              | C*08:02 | 0.0555              |
| <b>Case 4</b> | A*01:01 | 0.0985              | A*03:01 | 0.1024              | B*07:02 | 0.0799              | B*38:01 | 0.0362              | C*07:02 | 0.0907              | C*12:03 | 0.0686              |

HLA: Human leukocyte antigen.

**Table S2.** HLA class II (DRB1 and DQB1 loci) genomic typing of CVID patients with giardiasis. HLA allele frequencies in the Spanish Caucasian population are indicated (obtained from Gonzalez-Galarza FF et al., 2020).

|               | HLA-DRB1   | Allele<br>Frequency | HLA-DRB1   | Allele<br>Frequency | HLA-DQB1   | Allele<br>Frequency | HLA-DQB1   | Allele<br>Frequency |
|---------------|------------|---------------------|------------|---------------------|------------|---------------------|------------|---------------------|
| <b>Case 1</b> | DRB1*07:01 | 0.1696              | -          |                     | DQB1*02:02 | 0.1481              | DQB1*03:03 | 0.0288              |
| <b>Case 2</b> | DRB1*04:03 | 0.0158              | DRB1*10:01 | 0.0140              | DQB1*03:04 | 0.0022              | DQB1*05:01 | 0.1283              |
| <b>Case 3</b> | DRB1*11:02 | 0.0151              | DRB1*11:04 | 0.0405              | DQB1*03:01 | 0.1810              | -          |                     |
| <b>Case 4</b> | DRB1*11:01 | 0.0626              | DRB1*13:01 | 0.0719              | DQB1*03:01 | 0.1810              | DQB1*06:03 | 0.0736              |

HLA: Human leukocyte antigen.
